# Supplementary material for: Tumor Escape Phenotype in Bladder Cancer Is Associated with Loss of HLA Class I Expression, T-Cell Exclusion and Stromal Changes
Source: MDPI journal article supplement (doi:10.3390/ijms22147248), 2021-07-06
Supplement: s1 [file s1]

A

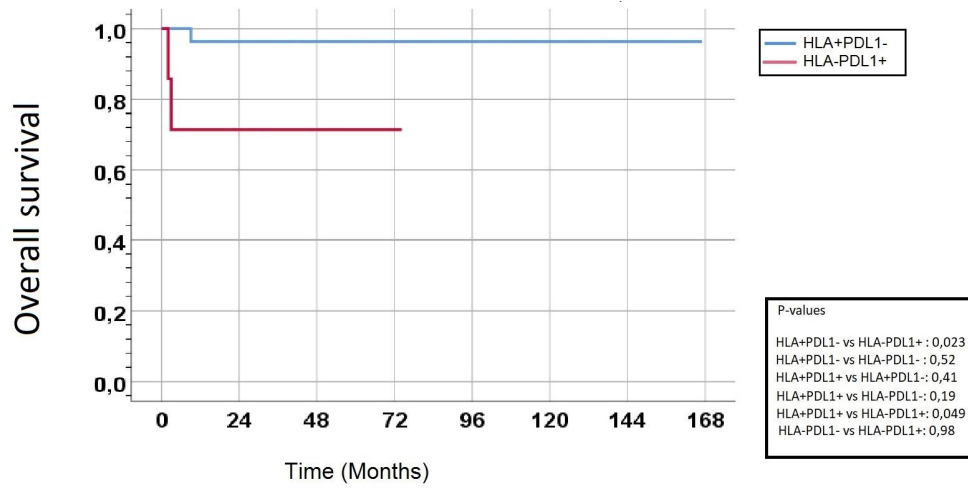

B

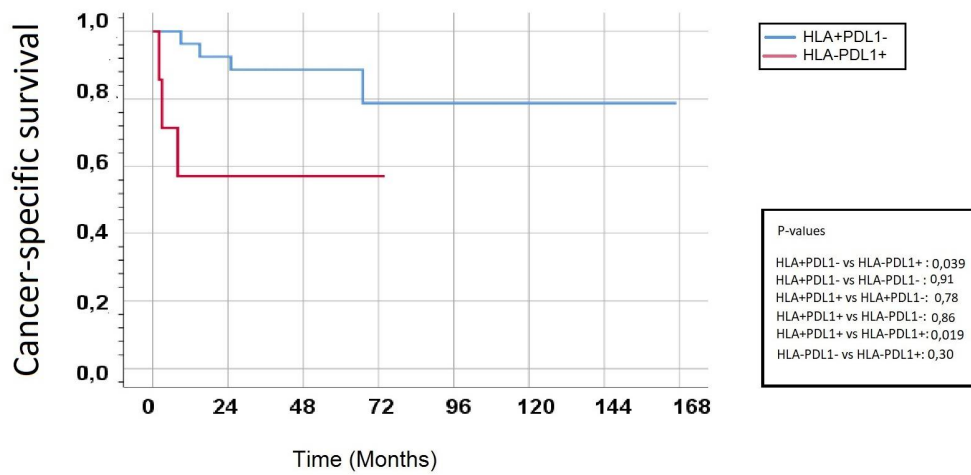

**Figure S1.** (A) Kaplan-Meier overall and (B) cancer-specific survival curves for patients with bladder cancer, HLA-I+/PD-L1- vs HLA-I-/PD-L1+ phenotypes. P-values were determined using the Log-Rank test. The value  $p < 0.05$  was considered statistically significant.
